# Supplementary material for: Rice Senescence-Induced Receptor-Like Kinase (OsSRLK) Is Involved in Phytohormone-Mediated Chlorophyll Degradation
Source: MDPI journal article supplement (doi:10.3390/ijms21010260), 2019-12-30
Supplement: s1 [file s1]

## Supplementary

Arabidopsis thaliana 1 -----MEALRYIYWGSLGSLIIVYNSLLEDAALPTTIMOT-----TRSLN  
Oryza sativa 1 -----MPPPLPCL-----APALAVLVV-VCAEPADRAALLPLACLR-----GRINW  
Brachypodium distachyon 1 -----MPPPLPCL-----AALLL-CAT-----GAPEDPADRAALLPLAVGVGGR-GRINW  
Triticum turgidum 1 -----MPPPLPCL-----AALLL-LSAT-----GAPEDPADRAALLPLAVGVGGR-----GRINW  
Hordeum vulgare 1 -----MPPPLPCL-----AALLL-SPM-----GAPEDPADRAALLPLAVGVGGR-GRINW  
Zea mays 1 MPTPLPSAGLLRLRICPLCLISAPR-----GAPEDPADRAALLPLAVGVGGRATARINW  
Sorghum bicolor 1 MPTPLPSAGLLRLRICPLCLISAPR-----GAPEDPADRAALLPLAVGVGGRATARINW  
Panicum miliaceum 1 -----MPPPLPCL-----AALLL-LSCLR-----GAPEDPADRAALLPLAVGVGGRARINW  
Setaria italica 1 -----MPPPLPCL-----AALLL-LSCLR-----GAPEDPADRAALLPLAVGVGGRARINW  
Arabidopsis thaliana 49 NPLSQ-----VCNNTGVTCNQGDSRLVRLPGLVGLSGIERNITSLRLATRVLSLR  
Oryza sativa 50 ASS-PR-----VCNNTGVTCNQGDSRLVRLPGLVGLSGIERNITSLRLATRVLSLR  
Brachypodium distachyon 49 NPLSQ-----VCNNTGVTCNQGDSRLVRLPGLVGLSGIERNITSLRLATRVLSLR  
Triticum turgidum 49 AAA-RP-----VCNNTGVTCNQGDSRLVRLPGLVGLSGIERNITSLRLATRVLSLR  
Hordeum vulgare 48 SA-RP-----VCNNTGVTCNQGDSRLVRLPGLVGLSGIERNITSLRLATRVLSLR  
Zea mays 59 STHLACSDAGDGG-FWGTGVTCSDAGRVALLPGLVGLSGVPTGLRLATRLVLSLR  
Sorghum bicolor 59 PTLACFSSASGAGWTGVTCSDAGRVALLPGLVGLSGVPTGLRLATRLVLSLR  
Panicum miliaceum 57 PAAPLACA-----ABGWTGVTCSDAGRVALLPGLVGLSGVPTGLRLATRLVLSLR  
Setaria italica 56 PTLACACA-----G-FWGTGVTCSDAGRVALLPGLVGLSGVPTGLRLATRLVLSLR  
Arabidopsis thaliana 102 SNLNLGKLVKPVLEKDKLAFLVGLHLPNAPSGALPLARALLOVLDSFNNGTGLPGL  
Oryza sativa 103 ANSLGAGFEBELDLASLALHLLHLPNAPSGALPLARALLOVLDSFNNGTGLPGL  
Brachypodium distachyon 102 ANSLGAGFEBELDLASLALHLLHLPNAPSGALPLARALLOVLDSFNNGTGLPGL  
Triticum turgidum 99 ANSLGAGFEBELDLASLALHLLHLPNAPSGALPLARALLOVLDSFNNGTGLPGL  
Hordeum vulgare 101 ANSLGAGFEBELDLASLALHLLHLPNAPSGALPLARALLOVLDSFNNGTGLPGL  
Zea mays 118 SNLNLGKLVKPVLEKDKLAFLVGLHLPNAPSGALPLARALLOVLDSFNNGTGLPGL  
Sorghum bicolor 119 SNLNLGKLVKPVLEKDKLAFLVGLHLPNAPSGALPLARALLOVLDSFNNGTGLPGL  
Panicum miliaceum 113 ANSLGGLPADLLPLALHLLHLPNAPSGALPLARALLOVLDSFNNGTGLPGL  
Setaria italica 111 ANSLGGLPADLLPLALHLLHLPNAPSGALPLARALLOVLDSFNNGTGLPGL  
Arabidopsis thaliana 162 SNLNLKRTGSLNLSLSCPLDLVLSLSCMLNLSNPLASH-PRRSTPFSSVYLD  
Oryza sativa 163 SNLNLKVAALNNLSNLSGRVPDLGLPALQFLNLSNNHLDGGEVPSLIRFADAFAGNN  
Brachypodium distachyon 162 SNLNLKVAALNNLSNLSGRVPDLGLPALQFLNLSNNHLDGGEVPSLIRFADAFAGNN  
Triticum turgidum 159 SNLNLKVAALNNLSNLSGRVPDLGLPALQFLNLSNNHLDGGEVPSLIRFADAFAGNN  
Hordeum vulgare 161 SNLNLKVAALNNLSNLSGRVPDLGLPALQFLNLSNNHLDGGEVPSLIRFADAFAGNN  
Zea mays 178 ANLNLKVAALNNLSNLSGRVPDLGLPALQFLNLSNNHLDGGEVPSLIRFADAFAGNN  
Sorghum bicolor 179 ANLNLKVAALNNLSNLSGRVPDLGLPALQFLNLSNNHLDGGEVPSLIRFADAFAGNN  
Panicum miliaceum 173 SNLNLKVAALNNLSNLSGRVPDLGLPALQFLNLSNNHLDGGEVPSLIRFADAFAGNN  
Setaria italica 171 SNLNLKVAALNNLSNLSGRVPDLGLPALQFLNLSNNHLDGGEVPSLIRFADAFAGNN  
Arabidopsis thaliana 222 IITPFGNNYT-----LVTPFSEBOTHQKPSKAFGLGSEVITLVITAVSVITITALE-VL  
Oryza sativa 221 VTPRASASA-----GTFPSGSGAAGAPAKERVLSEAILAIYVGGCVLFAVAVL  
Brachypodium distachyon 220 MTPFASASA-----EAPFSGGAPAGAKERVLSEAILAIYVGGCVLFAVAVL  
Triticum turgidum 219 MTPFASASA-----EAPFSGGAPAGAKERVLSEAILAIYVGGCVLFAVAVL  
Hordeum vulgare 219 MTPFASASA-----EAPFSGGAPAGAKERVLSEAILAIYVGGCVLFAVAVL  
Zea mays 236 LTRPAPAQAPVVPVVAPEELAA-----FPARPEELSEAILAIYVGGCVLFAVAVL  
Sorghum bicolor 237 LTRPAPAQAPVVPVVAPEELAA-----FPARPEELSEAILAIYVGGCVLFAVAVL  
Panicum miliaceum 231 VTRPAPAPVSPAQTPS-EPHAPAGAPARVLSEAILAIYVGGCVLFAVAVL  
Setaria italica 229 VTRPAPAPVSPAQTPS-EPHAPAGAPARVLSEAILAIYVGGCVLFAVAVL  
Arabidopsis thaliana 278 TVYVRRKL-----RRPGVILDNKLKGGKSPK-FIRMEDVNVNIFFEFGNYSFD  
Oryza sativa 277 ACFNRSGGGD-----EEVSVRVSGSKKRGRESPEKAVIGKAGDGNRIVFEFGSLAFDL  
Brachypodium distachyon 276 ACFNRSGD-----EEVSVRVSGKGGKRGRESPEKAVIGKAGDGNRIVFEFGSLAFDL  
Triticum turgidum 273 ACFNRSGD-----EESSRAGSGKGGKRGRESPEKAVIGKAGDGNRIVFEFGSLAFDL  
Hordeum vulgare 274 ACFNRSGD-----EESSRAGSGKGGKRGRESPEKAVIGKAGDGNRIVFEFGSLAFDL  
Zea mays 293 ACFNRSGD-----EESSRAGSGKGGKRGRESPEKAVIGKAGDGNRIVFEFGSLAFDL  
Sorghum bicolor 297 ACFNRSGD-----EESSRAGSGKGGKRGRESPEKAVIGKAGDGNRIVFEFGSLAFDL  
Panicum miliaceum 294 ACFNRSGD-----EESSRAGSGKGGKRGRESPEKAVIGKAGDGNRIVFEFGSLAFDL  
Setaria italica 284 ACFNRSGD-----EESSRAGSGKGGKRGRESPEKAVIGKAGDGNRIVFEFGSLAFDL  
Arabidopsis thaliana 333 EDLLRASAELVGKAGFTAYRAVEDATTVVVRKLEVNAGRDFEQOMELGRIHRIDNV  
Oryza sativa 331 EDLLRASAELVGKAGFTAYRAVEDATTVVVRKLEVNAGRDFEQOMELGRIHRIDNV  
Brachypodium distachyon 331 EDLLRASAELVGKAGFTAYRAVEDATTVVVRKLEVNAGRDFEQOMELGRIHRIDNV  
Triticum turgidum 328 EDLLRASAELVGKAGFTAYRAVEDATTVVVRKLEVNAGRDFEQOMELGRIHRIDNV  
Hordeum vulgare 331 EDLLRASAELVGKAGFTAYRAVEDATTVVVRKLEVNAGRDFEQOMELGRIHRIDNV  
Zea mays 353 EDLLRASAELVGKAGFTAYRAVEDATTVVVRKLEVNAGRDFEQOMELGRIHRIDNV  
Sorghum bicolor 357 EDLLRASAELVGKAGFTAYRAVEDATTVVVRKLEVNAGRDFEQOMELGRIHRIDNV  
Panicum miliaceum 345 EDLLRASAELVGKAGFTAYRAVEDATTVVVRKLEVNAGRDFEQOMELGRIHRIDNV  
Setaria italica 340 EDLLRASAELVGKAGFTAYRAVEDATTVVVRKLEVNAGRDFEQOMELGRIHRIDNV  
Arabidopsis thaliana 393 VELRAYYSKDEKLLVYDYSRGVSNNMLHGKRGEDTPTLFDWETRKIALGAARGIAHTH  
Oryza sativa 395 AELRAYYSKDEKLLVYDYSRGVSNNMLHGKRGEDTPTLFDWETRKIALGAARGIAHTH  
Brachypodium distachyon 391 AELRAYYSKDEKLLVYDYSRGVSNNMLHGKRGEDTPTLFDWETRKIALGAARGIAHTH  
Triticum turgidum 391 AELRAYYSKDEKLLVYDYSRGVSNNMLHGKRGEDTPTLFDWETRKIALGAARGIAHTH  
Hordeum vulgare 391 AELRAYYSKDEKLLVYDYSRGVSNNMLHGKRGEDTPTLFDWETRKIALGAARGIAHTH  
Zea mays 413 VELRAYYSKDEKLLVYDYSRGVSNNMLHGKRGEDTPTLFDWETRKIALGAARGIAHTH  
Sorghum bicolor 417 VELRAYYSKDEKLLVYDYSRGVSNNMLHGKRGEDTPTLFDWETRKIALGAARGIAHTH  
Panicum miliaceum 405 VELRAYYSKDEKLLVYDYSRGVSNNMLHGKRGEDTPTLFDWETRKIALGAARGIAHTH  
Setaria italica 400 VELRAYYSKDEKLLVYDYSRGVSNNMLHGKRGEDTPTLFDWETRKIALGAARGIAHTH  
Arabidopsis thaliana 453 TENNGKFVHGNIKASNVFLNNOCGGICSDGLASLMPNITA-RSRLSGYCAPEVTRKKA  
Oryza sativa 455 TENNGKFVHGNIKASNVFLNNOCGGICSDGLASLMPNITA-RSRLSGYCAPEVTRKKA  
Brachypodium distachyon 451 TENNGKFVHGNIKASNVFLNNOCGGICSDGLASLMPNITA-RSRLSGYCAPEVTRKKA  
Triticum turgidum 448 TENNGKFVHGNIKASNVFLNNOCGGICSDGLASLMPNITA-RSRLSGYCAPEVTRKKA  
Hordeum vulgare 451 TENNGKFVHGNIKASNVFLNNOCGGICSDGLASLMPNITA-RSRLSGYCAPEVTRKKA  
Zea mays 473 TENNGKFVHGNIKASNVFLNNOCGGICSDGLASLMPNITA-RSRLSGYCAPEVTRKKA  
Sorghum bicolor 477 TENNGKFVHGNIKASNVFLNNOCGGICSDGLASLMPNITA-RSRLSGYCAPEVTRKKA  
Panicum miliaceum 465 TENNGKFVHGNIKASNVFLNNOCGGICSDGLASLMPNITA-RSRLSGYCAPEVTRKKA  
Setaria italica 460 TENNGKFVHGNIKASNVFLNNOCGGICSDGLASLMPNITA-RSRLSGYCAPEVTRKKA  
Arabidopsis thaliana 513 SCSSDVYSGFVLELLTGKSPVQITGG-NEVVHLVRWQSVVREWTAAYFVDELLRY  
Oryza sativa 514 SCSSDVYSGFVLELLTGKSPVQITGG-NEVVHLVRWQSVVREWTAAYFVDELLRY  
Brachypodium distachyon 510 SCSSDVYSGFVLELLTGKSPVQITGG-NEVVHLVRWQSVVREWTAAYFVDELLRY  
Triticum turgidum 507 SCSSDVYSGFVLELLTGKSPVQITGG-NEVVHLVRWQSVVREWTAAYFVDELLRY  
Hordeum vulgare 510 SCSSDVYSGFVLELLTGKSPVQITGG-NEVVHLVRWQSVVREWTAAYFVDELLRY  
Zea mays 532 SCSSDVYSGFVLELLTGKSPVQITGG-NEVVHLVRWQSVVREWTAAYFVDELLRY  
Sorghum bicolor 536 SCSSDVYSGFVLELLTGKSPVQITGG-NEVVHLVRWQSVVREWTAAYFVDELLRY  
Panicum miliaceum 524 SCSSDVYSGFVLELLTGKSPVQITGG-NEVVHLVRWQSVVREWTAAYFVDELLRY  
Setaria italica 519 SCSSDVYSGFVLELLTGKSPVQITGG-NEVVHLVRWQSVVREWTAAYFVDELLRY  
Arabidopsis thaliana 571 PNIEEEMVELQIAMCVSRTPERRRKAADVITIEVRRSDT-----STIPSTEA  
Oryza sativa 573 PNIEEEMVELQIAMCVSRTPERRRKAADVITIEVRRSDT-----STIPSTEA  
Brachypodium distachyon 569 PNIEEEMVELQIAMCVSRTPERRRKAADVITIEVRRSDT-----STIPSTEA  
Triticum turgidum 566 PNIEEEMVELQIAMCVSRTPERRRKAADVITIEVRRSDT-----STIPSTEA  
Hordeum vulgare 569 PNIEEEMVELQIAMCVSRTPERRRKAADVITIEVRRSDT-----STIPSTEA  
Zea mays 592 PNIEEEMVELQIAMCVSRTPERRRKAADVITIEVRRSGGTATGT-----STIPSTEA  
Sorghum bicolor 595 PNIEEEMVELQIAMCVSRTPERRRKAADVITIEVRRSDT-----STIPSTEA  
Panicum miliaceum 583 PNIEEEMVELQIAMCVSRTPERRRKAADVITIEVRRSD

**Figure S1.** Amino acid sequence alignment of RLK protein. The amino acid sequences for OsSRLK proteins of other plant species homologous to rice SRLK were obtained from NCBI through BLAST analysis. Sequence alignment was performed using ClustalW with default parameters. The sequences are as follows: *Arabidopsis thaliana*, NM\_118505.5; *Oryza sativa*, LOC\_Os01g12390.1; *Brachypodium distachyon*, XP\_003565740; *Triticum turgidum*, VAH59131; *Hordeum vulgare*, BAJ86409; *Zea mays*, NP\_001168844; *Sorghum bicolor*, XP\_021312403; *Panicum miliaceum*, RLN23550; *Setaria italic*, XP\_004967473. Red and blue bars represent the leucine rich repeats and catalytic domain of serine/threonine kinases, respectively.

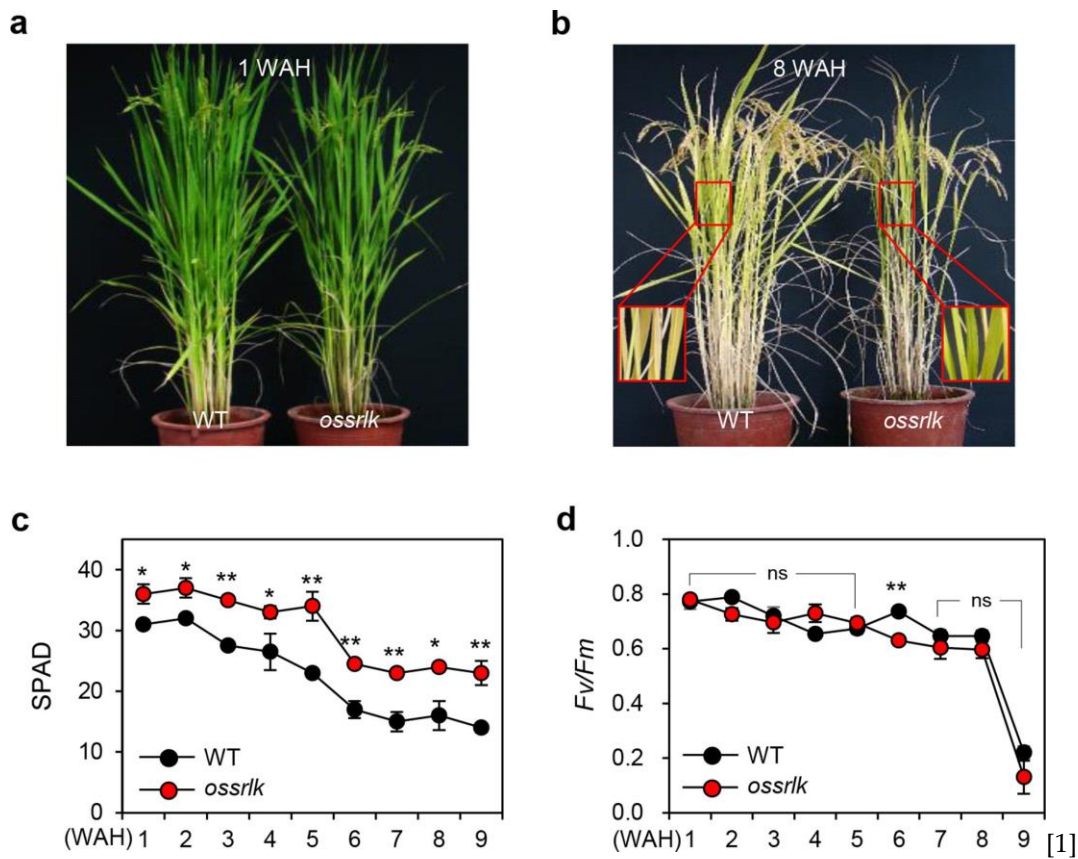

**Figure S2.** The senescence phenotype of *ossrlk* under natural senescence conditions in the field. The plants were photographed 1 week after heading (WAH) (a) and 8 WAH (b). SPAD value (c) and  $F_v/F_m$  (efficiency of photosystem II) (d) were measured in WT and *ossrlk* every 1 week from 1 WAH to 9 WAH. Mean and standard deviation values were obtained from 10 measurements. Asterisks indicate a significant difference between WT and *ossrlk* mutant (Student's *t*-test, \* $P < 0.05$ , \*\* $P < 0.01$ ). n.s., not significant.

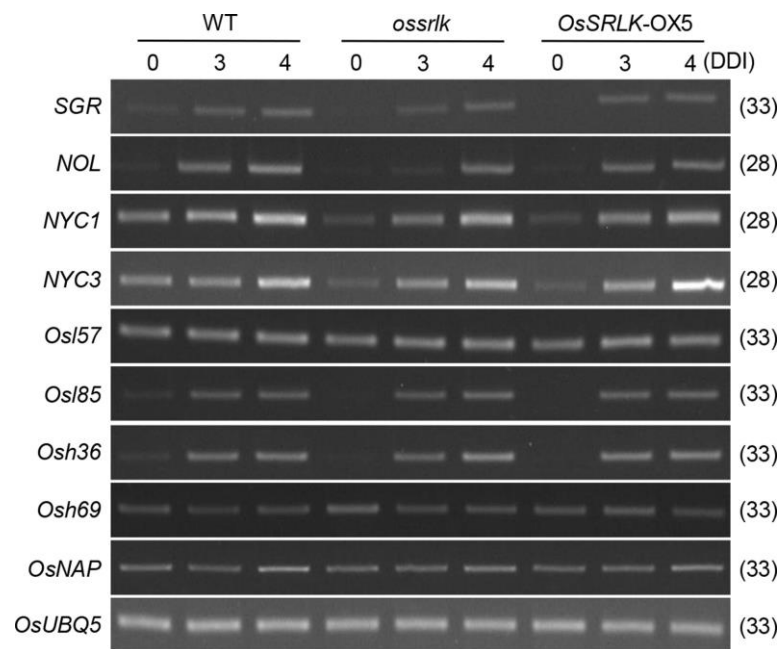

**Figure S3.** Expression of CDGs and SAGs in *ossrlk* and *OsSRLK-OX5* during DIS. Total RNA was isolated from the detached leaves of WT, *ossrlk*, and *OsSRLK-OX5* plants under DIS, as presented in Figure 2 (2 c,h). Transcripts of CDGs (*SGR*, *NOL*, *NYC1*, and *NYC3*) and SAGs (*Osl57*, *Osl85*, *Osh36*, *Osh69*, and *OsNAP*) were determined by reverse-transcriptase PCR analysis. *OsUBQ5* was used as a loading control. Numbers in parentheses indicate the numbers of PCR cycles. DDI, day(s) of dark incubation.

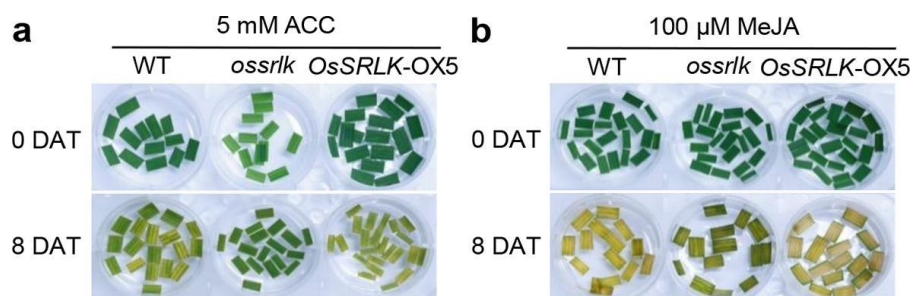

**Figure S4.** Phytohormone hypersensitivity of *ossrlk*. Detached leaves of 3-week-old WT, *ossrlk*, and *OsSRLK-OX5* plants were treated with 3 mM MES buffer (pH 5.8) containing 5 mM ACC (1-aminocyclopropane-1-carboxylic acid) (a) and 100  $\mu$ M MeJA (b) under continuous light conditions at 28  $^{\circ}$ C. DAT, day(s) after treatment.

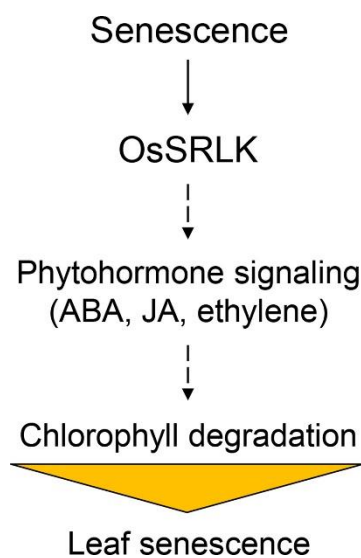

**Figure S5.** Proposed model for the role of OsSRLK in leaf senescence. Solid and dashed arrows represent direct and indirect activation, respectively.



**Supplemental Table S1.** Primers used in this study

| A. Primers for verification of T-DNA insertion |                                       |                                       |
|------------------------------------------------|---------------------------------------|---------------------------------------|
| Primer name                                    | Left primers (5' → 3')                | Right primers (5' → 3')               |
| PFG_1A-15835                                   | TCTCCCTCATCAAAACGTCC                  | AGTGAGAGGAGCTCCTCCG                   |
| pGA2717                                        | ACGCTGAACTTGTGGCCGTT                  | AACGCTGATCAATTCCACAG                  |
| B. Primers for RT-qPCR                         |                                       |                                       |
| Genes                                          | Forward primers (5' → 3')             | Reverse primers (5' → 3')             |
| <i>OsSRLK</i>                                  | GACGTCGAGCTGATGAGGTA                  | CACCACGTCCGACATCTTAG                  |
| <i>OsUBQ5</i>                                  | ACCACTTCGACCGCCACTACT                 | ACGCCTAAGCCTGCTGGTT                   |
| C. Primers for RT-PCR                          |                                       |                                       |
| Genes                                          | Forward primers (5' → 3')             | Reverse primers (5' → 3')             |
| <i>OsSRLK</i>                                  | TTGTTGGACAGATTCAAGAA                  | ATAGAGACTACTGTGAAACA                  |
| <i>SGR</i>                                     | AGGGGTGGTACAACAAGCTG                  | GCTCCTTGCGGAAGATGTAG                  |
| <i>NOL</i>                                     | GAAAGGGTAGAATCTGCGGTG                 | CTGCAGAGATTTTGTAAGGTG                 |
| <i>NYC1</i>                                    | GAATCCGTAATTGGGCTGAA                  | CTGGAAGAGGTCCACCTGAG                  |
| <i>NYC3</i>                                    | TGCTGCATCCTGTCCACACCTTG               | GATGCAAATGATGCAGCAGCTGC               |
| <i>OsI57</i>                                   | ACCCTAAAGTAAATGAAGTC                  | CCTGCTCTTGTCTTGTTA                    |
| <i>OsI85</i>                                   | CGTCACGGACACGTTCGC                    | GCAAGAACATGGCTGCTGC                   |
| <i>Osh36</i>                                   | GTTGAGGCGATGGTCAACC                   | CAGTGTAAGCCGGGCAATC                   |
| <i>Osh69</i>                                   | CCTGCTCTTGTCTTGTTA                    | GGTGAACACTATGGAACA                    |
| <i>OsNAP</i>                                   | AACCATTTCATCGCGAACAAC                 | CAGTGACGATCCCTGCAAGG                  |
| <i>OsUBQ5</i>                                  | ACCACTTCGACCGCCACTACT                 | ACGCCTAAGCCTGCTGGTT                   |
| D. Primers for plant transformation            |                                       |                                       |
| Primer name                                    | Forward primer (5' → 3') <sup>a</sup> | Reverse primer (5' → 3') <sup>a</sup> |
| <i>OsSRLK_HindIII</i><br>and <i>HpaI</i>       | <u>AAGCTT</u> ATGCCGCCGCGAGGCTG       | <u>GTAACT</u> CAGAGGAGCTCCTCCG        |

<sup>a</sup>The underlined nucleotides represent the restriction site for restriction enzymes.
